# Supplementary material for: KICK OUT PD: Feasibility and quality of life in the pilot karate intervention to change kinematic outcomes in Parkinson’s Disease
Source: PLOS journal article supplement (doi:10.1371/journal.pone.0237777), 2020-09-09

# KICK-OUT PD:

## An Introduction to Parkinson's Disease and a New Intervention to Fight It

Jori Fleisher, MD MSCE

Assistant Professor of  
Neurological Sciences

Rush University Medical Center

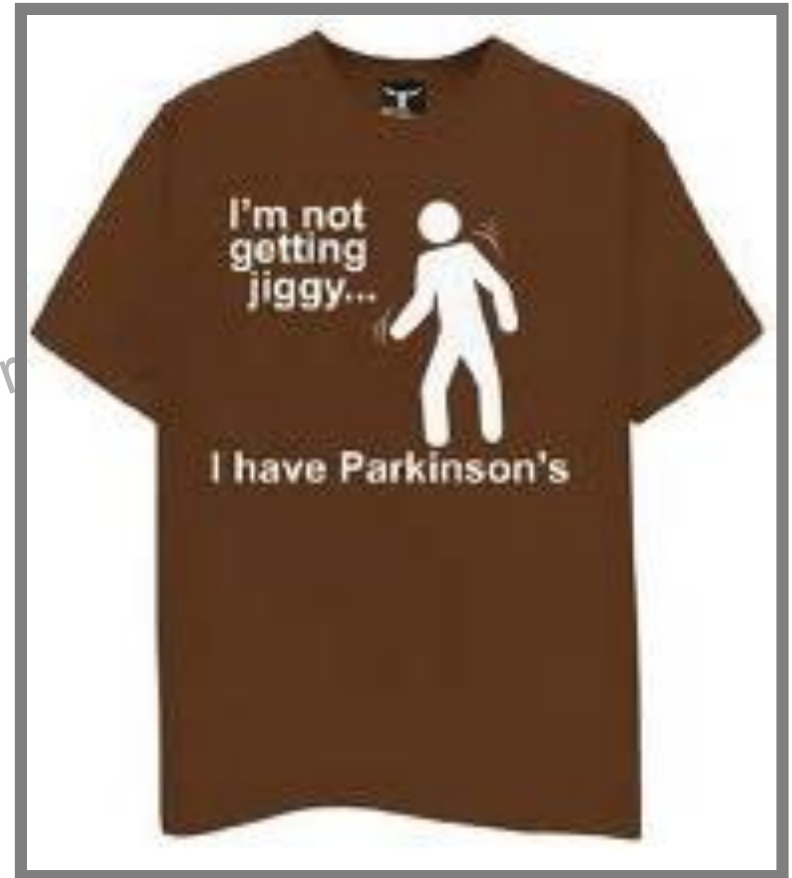

# Overview

- What is Parkinson's Disease?
  - Who gets it and when
  - Motor symptoms
  - Non-motor symptoms
- Life with PD
- KICK-OUT PD Study

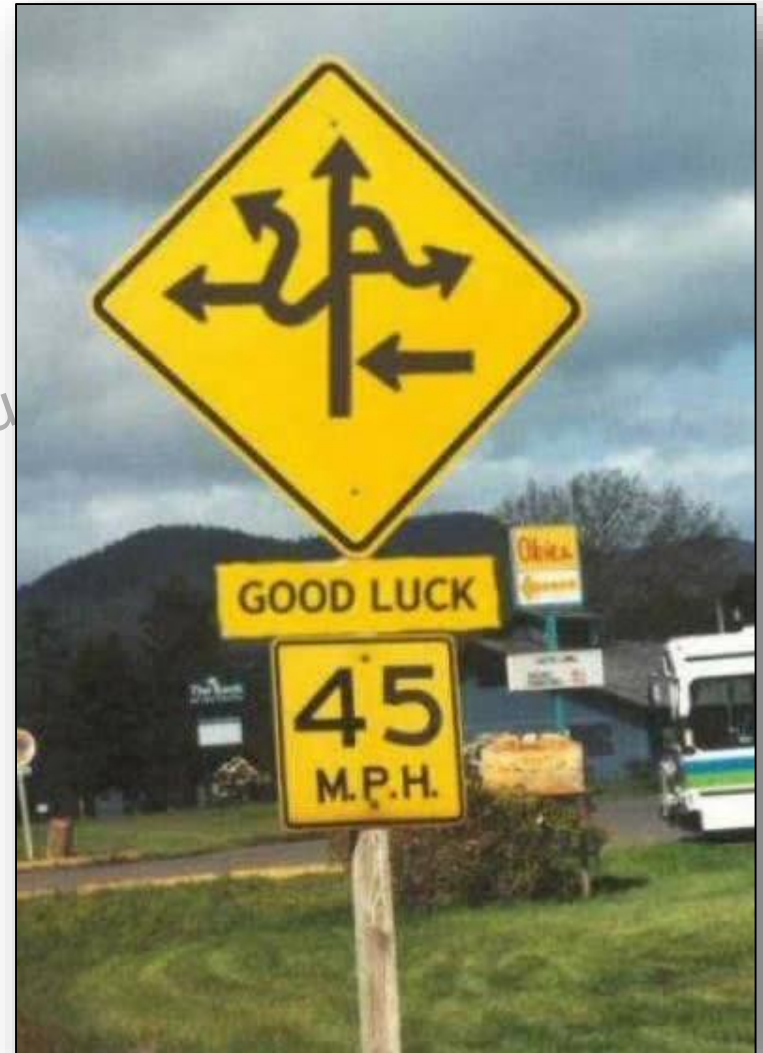

# Parkinson's Disease

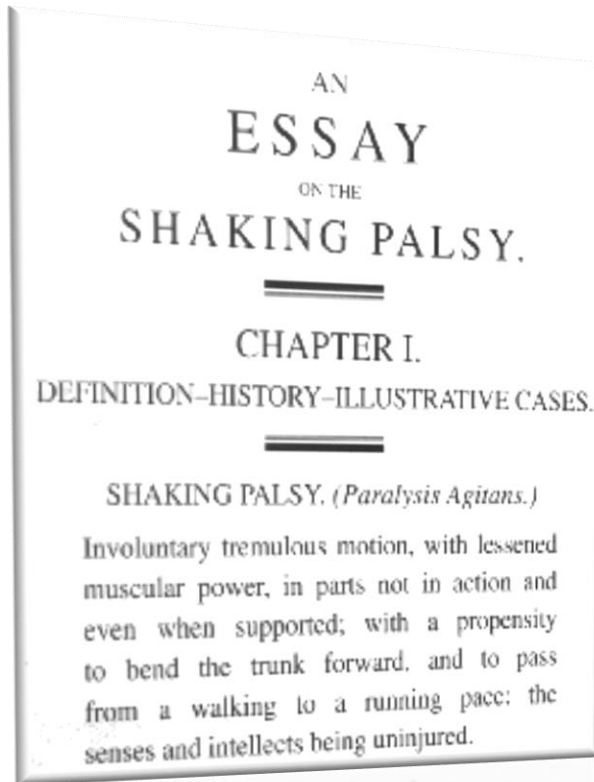

- **First described in 1817, based on SIX patients!**
- **2<sup>nd</sup> most common neurodegenerative disease**
  - 1-2% of ppl >65y, 3-5% over age 85
  - 1-2 million people in the US & in Europe
  - More common in men (M:F ~1.5)
- **Progressive over time**
  - Symptoms and time course are **HIGHLY VARIABLE**
  - Every person with PD is different, though the vast majority will **SLOWLY WORSEN** over time
- **Incurable at this time**

# Parkinson's Disease

- Symptom onset most often in 50s-60s
- Brain cells that produce dopamine start to die off prematurely
  - Dopamine involved with initiating and controlling movement; also with reward pathways and motivation
- Numerous medications and surgical options
  - Many symptoms can be managed much better and for much longer than ever before
- For most people, does not affect life expectancy

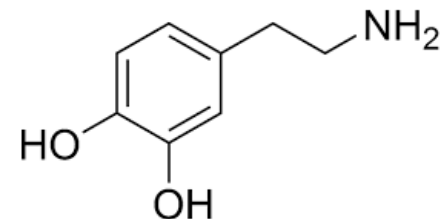

# PD Clinical Features

- **Diagnostic features of *parkinsonism*:**

- Slow, small movements (Akinesia/bradykinesia)
- PLUS ONE of the following
  - Tremor (resting, 4-6Hz)
  - Rigidity
  - Postural instability

**T**remor

**R**igidity

**A**kinesia

**P**ostural instability

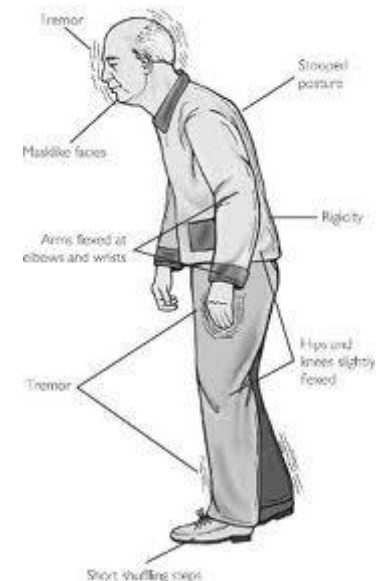

# PD Clinical Features

- Supportive criteria for the diagnosis
  - Meets criteria for parkinsonism PLUS
    - Begins on one side
    - Stays asymmetric
    - Progressive disorder
    - Response to levodopa
    - Gait problems: freezing, shuffling, falling
    - Stooped posture
    - Quiet, rushed voice
    - Decreased facial expression
    - Small, illegible handwriting (micrographia)

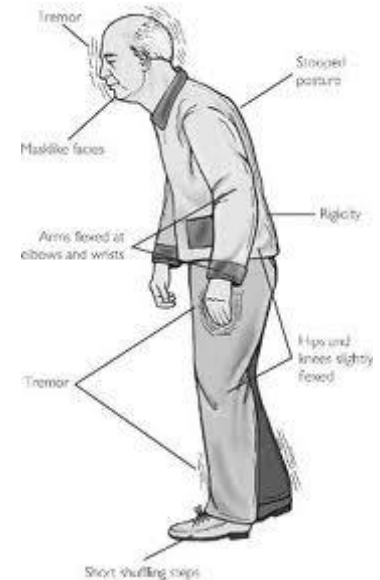

# Motor & nonmotor manifestations

- Motor:
  - T.R.A.P.
- Nonmotor:
  - Sleep disturbances
  - Fatigue
  - Depression & Anxiety
  - Apathy
  - Cognitive changes and dementia
  - Pain & sensory changes
  - Quieter, hoarser, more strained voice
  - Constipation
  - Autonomic dysfunction (low blood pressure, dizziness or passing out)
  - Drooling, trouble swallowing, choking

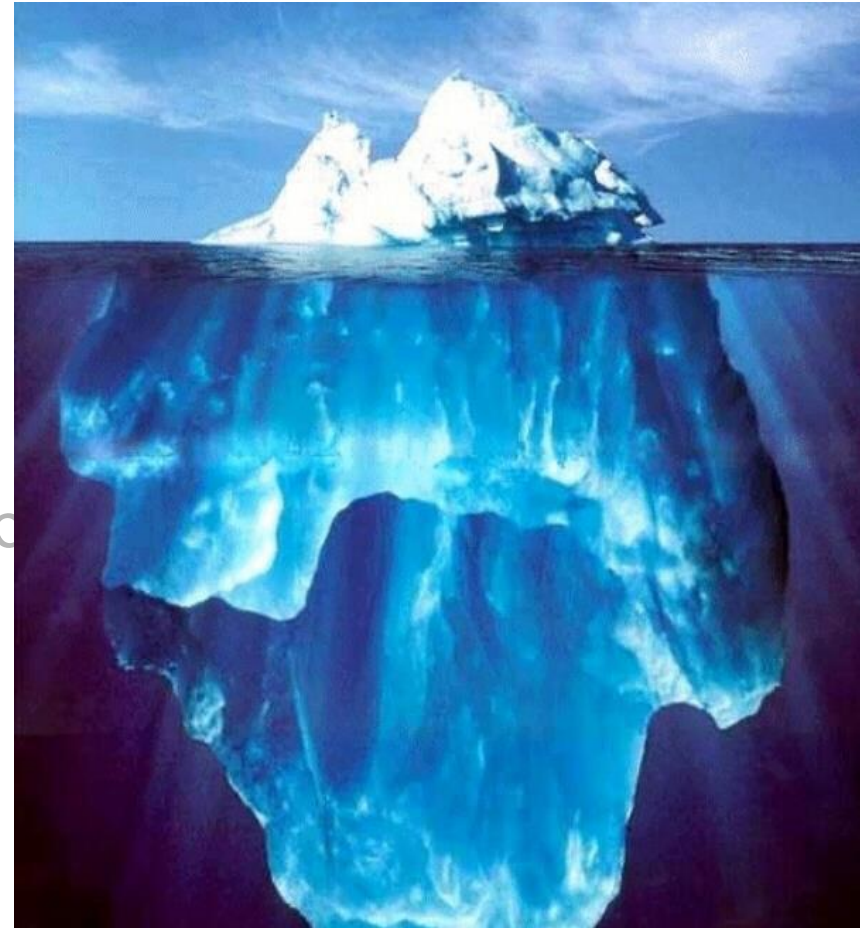

# Medication vs. Exercise

- Medication:
  - Covers up the symptoms
  - Disease progresses unchanged
- Exercise:
  - Covers up the symptoms
  - *May change how quickly disease progresses*

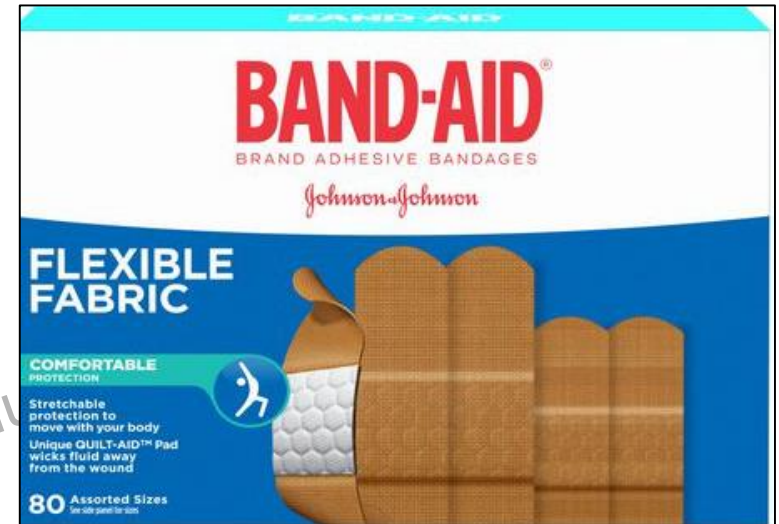



# Cognitive changes

- >30% of people with PD have some degree of cognitive change in specific areas
- Things that can be affected:
  - “Tip-of-the-tongue” phenomenon
  - Attention, multitasking
  - Active memory
  - Executive function
  - Visuospatial function
  - Speed of thinking

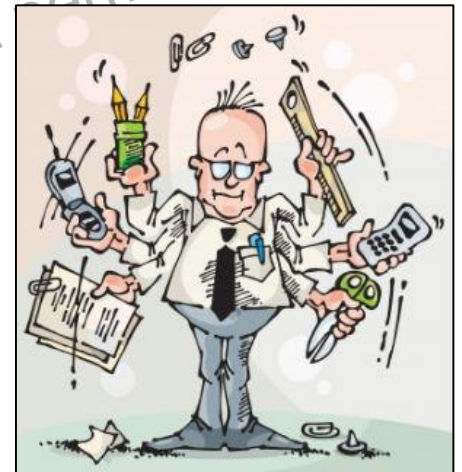

# Autonomic changes

- Orthostatic hypotension:

- After sitting or lying for prolonged period, blood pools in legs.
- Normal reflex on sitting/standing: veins constrict, push blood back to center of body
- PD: reflex is blunted; lightheaded or dizzy on standing too quickly, brain not receiving enough blood flow

- How to help:

- SLOW transitions between lying/seated and standing positions
- If symptomatic, return to horizontal position, slowly transition again
- Adequate hydration is key!

- Excessive sweating:

- Less common but possible; more of a nuisance and dehydration risk; encourage adequate hydration!

# Parkinson's Disease

- Late symptoms
  - Motor fluctuations (on/off phenomena)
  - Freezing
  - Loss of drug effect, drug failures
  - Dyskinesias
  - Gait imbalance, freezing

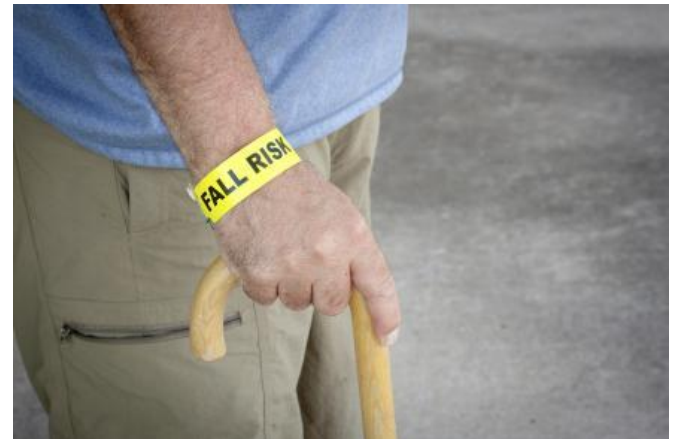

# Life with PD

- Patients may be late

- *What if leaving the house took 3 times as long?*
- *What if driving & parking were twice as stressful?*
- *What if you checked the map multiple times before arriving and **still** got lost?*
- *What if you used the restroom twice before arriving but still felt you might have an accident as you waited for the elevator?*

# How Can We Help?

- Patients may be late

- Greet them with a smile, “glad you were able to make it”, and benefit of the doubt
  - Traffic is a big source of anxiety for people with parkinsonism
  - Visuospatial processing (getting to a specific office, navigating maps) is challenging, can be a source of embarrassment

Copyright pending – do not reproduce without permission

# Life with PD

- Patients may be slow

- *What if the more you tried to hurry, the **slower** you became?*
- *What if you were dependent on a pill every few hours to move?*
- *What if you suddenly became frozen and unable to move without warning?*
- *What if the more you tried to rush, the **dizzier** you became?*

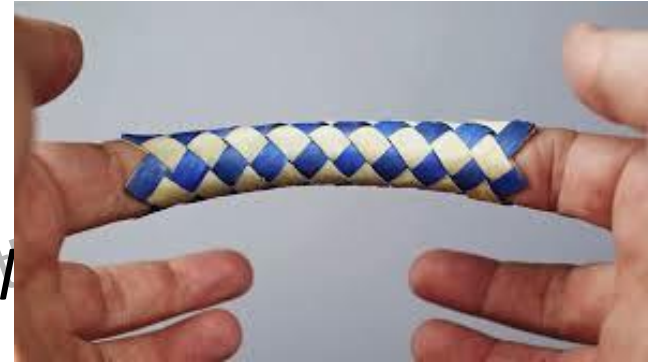

# How Can We Help?

- Patients may be slow

- Paradox: The more they try to rush, the *slower* things get.
- Solution: *Patience*. Encourage them to take their time, take a breath.
  - Minimize any multitasking or distractions
- Bradyphrenia (slow thinking/processing):
  - Allow an extra few seconds for an answer

# Life with PD

- Patients may be hard to understand
  - *What if you thought you were speaking at full volume, but no one could hear you?*
  - *What if you couldn't think of the word you wanted to say when everyone was watching?*

Copyright pending – do not reproduce without permission



# How Can We Help?

- Patients may be hard to understand

- Hypophonia: Quiet voice that gets quieter, more rushed as person speaks
- Dysarthria: Slurred speech
- Word-finding difficulties
- Pressured or tangential speech
- Ask simple, clarifying questions: “It sounds like you said....”, “Did you mean...?”

# KICK-OUT PD

- *Karate Intervention to Change Kinematic OUTcomes in Parkinson's Disease*
- First of its kind pilot study of a karate intervention for people with early to middle-stage PD
- Supported by private philanthropic donation

# KICK-OUT PD

- Rationale: Research shows that...
  - Aerobic exercise has symptomatic and neuroprotective benefits in PD
  - Tai chi, yoga, and pilates have benefits for strength and balance in PD
  - Mindfulness training and meditation may be helpful for attention, anxiety, and depression in PD

# KICK-OUT PD

- Strong enthusiasm for boxing in PD, especially among people who have not exercised otherwise
  - Aerobic benefits, plus ? emotional benefit
- If aerobic exercise, group exercise, tai chi, and mindfulness are each beneficial....

...could karate for PD combine these?

...could it be even more powerful than the individual disciplines?

# KICK-OUT PD

## Pre-Intervention Study Visit

- At Rush
- Basic health information; test balance, gait, attention, anxiety, depression
- Focus group to discuss past experience with martial arts and exercise, expectations

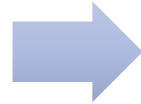

## Karate Classes

- Wilmette and Park Ridge Dojos
- **10 weeks long**
- **Each participant attends 2 classes per week** at one dojo location
- 15 participants per class

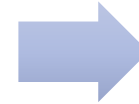

## Post-Intervention Study Visit

- Basic health information; test balance, gait, attention, anxiety, depression
- Focus group to discuss experience with classes, goals achieved, future directions

# KICK-OUT PD

- We are measuring changes in:
  - Balance
  - Gait
  - Flexibility
  - Attention
  - Anxiety
  - Depression
- Participant's overall impression of change

Copyright pending – do not reproduce without permission

# Questions?



LET TODAY  
BE THE  
START OF  
Something New

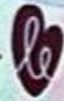

Supplement: S2 (10.1371/journal.pone.0237777.s002) [file journal.pone.0237777.s002]
